# Supplementary material
Source: publisher figshare collection journal article supplement (https://aacr.figshare.com/articles/dataset/_/22516773)

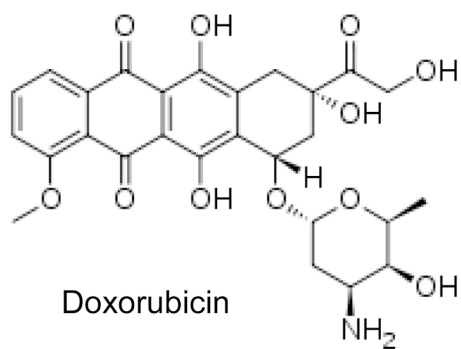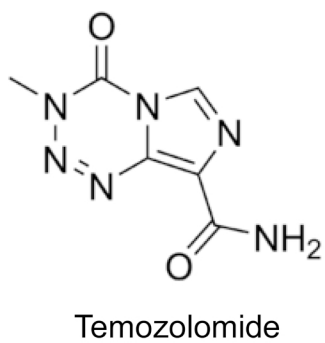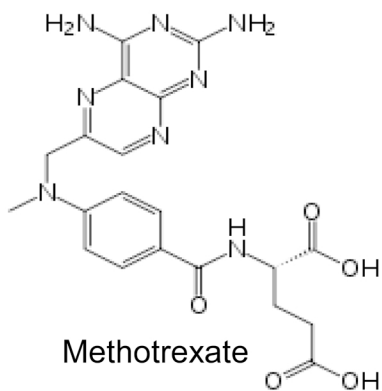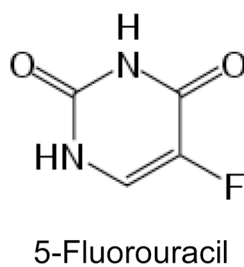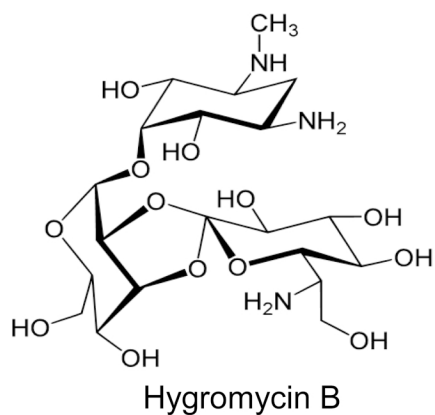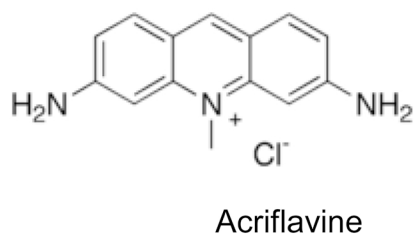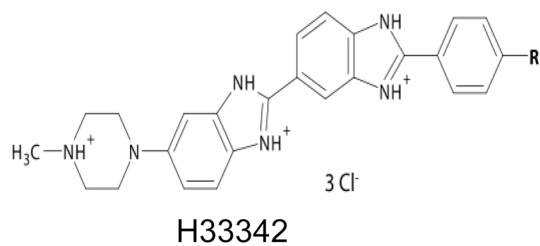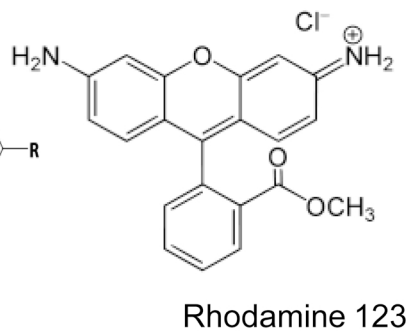

Fig S1

Supplement: Supplementary file 1 [file 39979347]
